# Supplementary material
Source: Springer Nature journal article supplement (https://www.springermedizin.de/resource/supplementary/12889_2012_4930_MOESM11_ESM.pdf/9492572)

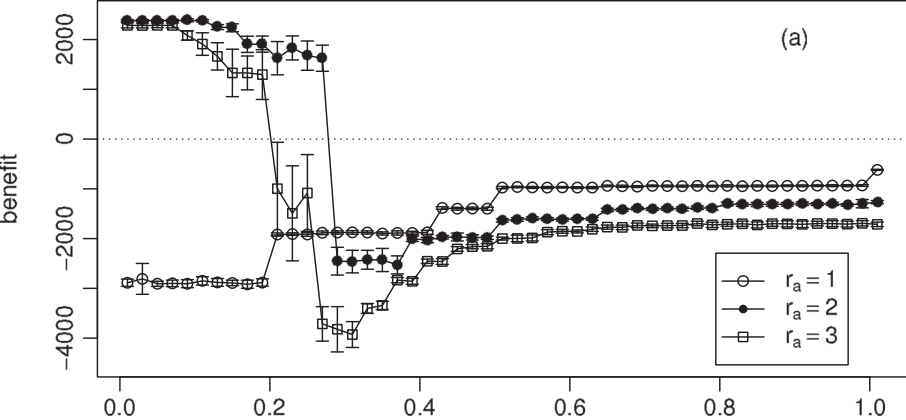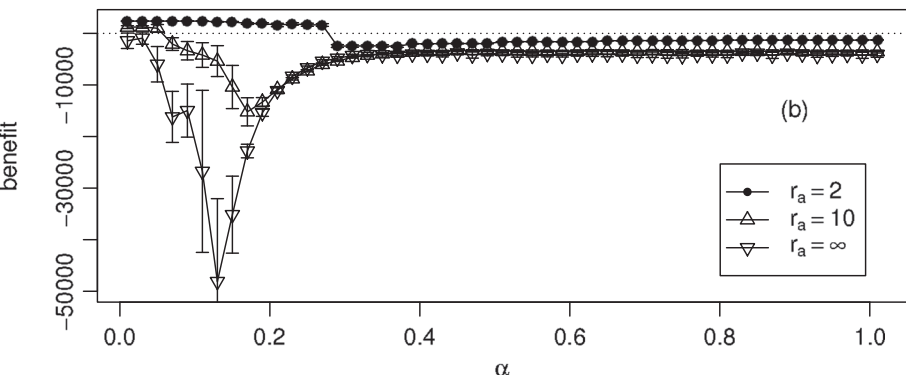

Supplement: MOESM11 [file 9492572]
